# Supplementary material for: One-pot synthesis of photoluminescent carbon nanodots by carbonization of cyclodextrin and their application in Ag+ detection
Source: Royal Society of Chemistry journal article supplement (doi:10.1039/c4ra11491d), 2014-01-01
Supplement: c4ra11491d1.pdf [file c4ra11491d1.pdf]

## Electronic Supplementary Information

### One-pot synthesis of photoluminescent carbon dots by carbonization of cyclodextrin and their application in Ag<sup>+</sup> detection

Meng Hu, Yu Yang, Xiaoyu Gu, Yang Hu, Jian Huang, and Chaoyang Wang<sup>1</sup>

Table S1. Fluorescence quantum yield and product yield of C-dots from different carbohydrates.

| Samples        | Quantum yield | Yield |
|----------------|---------------|-------|
| β-Cyclodextrin | 13.5%         | 34%   |
| Fructose       | 11.5%         | 8%    |
| Glucose        | 7.5%          | 13%   |
| Citrate        | —             | —     |

Table S2. The yield of C-dots from β-cyclodextrin at different temperatures

| Temperature (°C) | 50 | 60 | 70 | 80 | 90 |
|------------------|----|----|----|----|----|
| Yield (%)        | 0  | 16 | 34 | 23 | 11 |

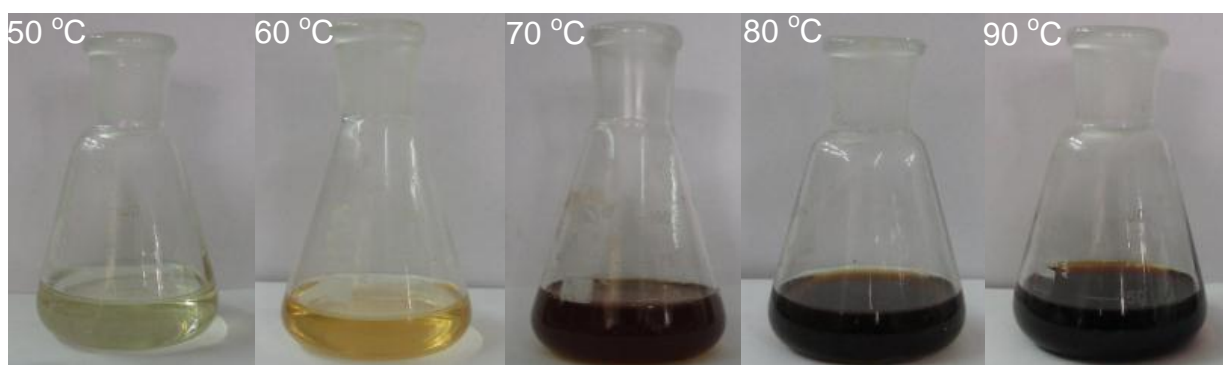

Figure. S1. Photographs of solutions with  $\beta$ -cyclodextrin (2 g), hydrochloric acid (15 mL, 36-38 wt.%) and deionized water (15 mL) at different temperatures for 4 h.

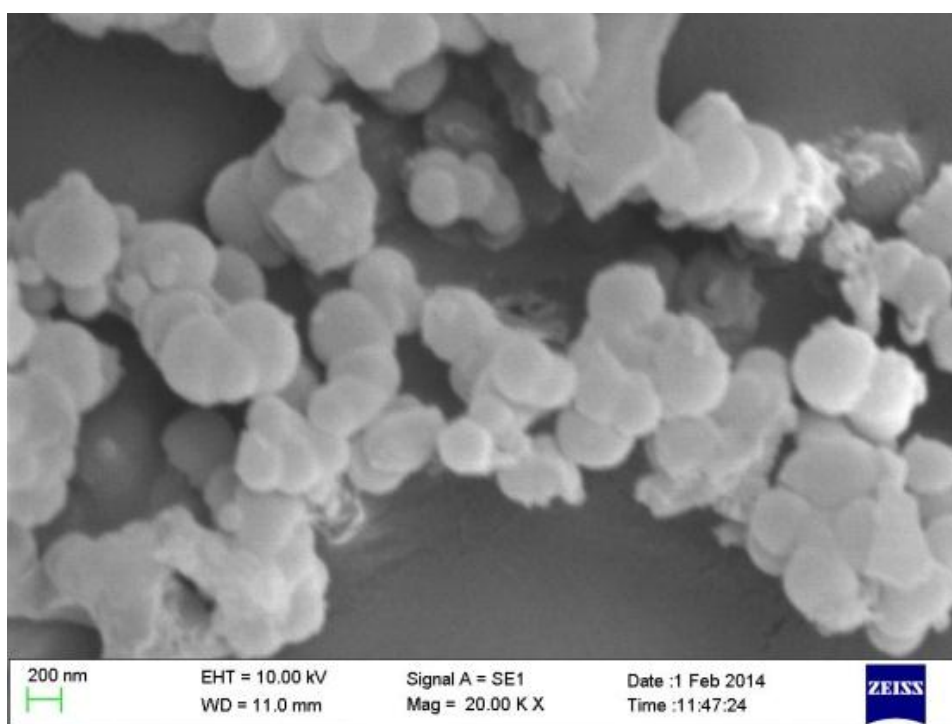

Figure. S2. Carbon spheres formed by further dehydration and aggregation of C-dots.

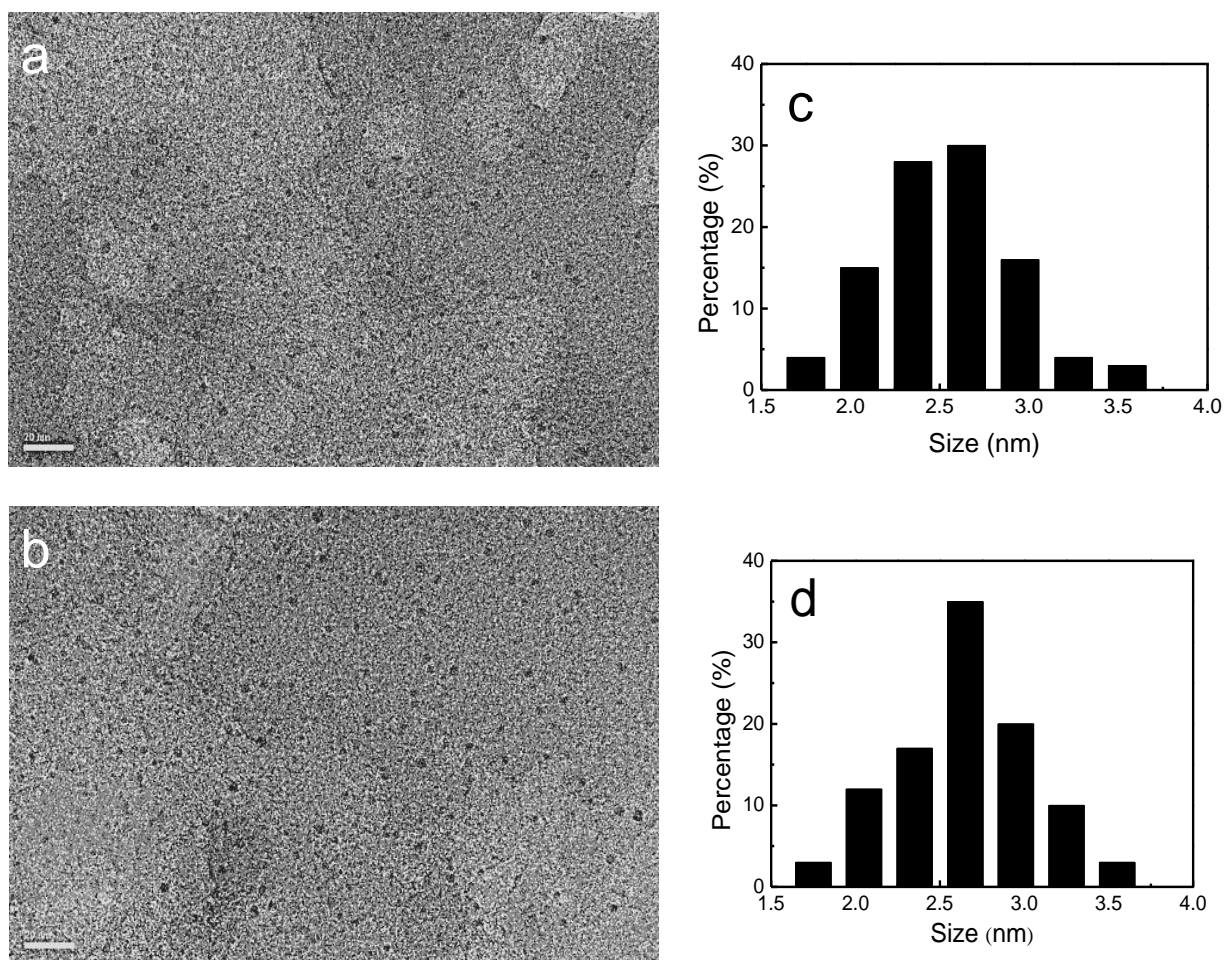

Figure. S3. (a,b) TEM images and (c,d) size histograms (counting 100 particles at least) of C-dots synthesized from  $\alpha$  and  $\gamma$ -cyclodextrins, respectively. Scale bars in a,b: 20 nm..

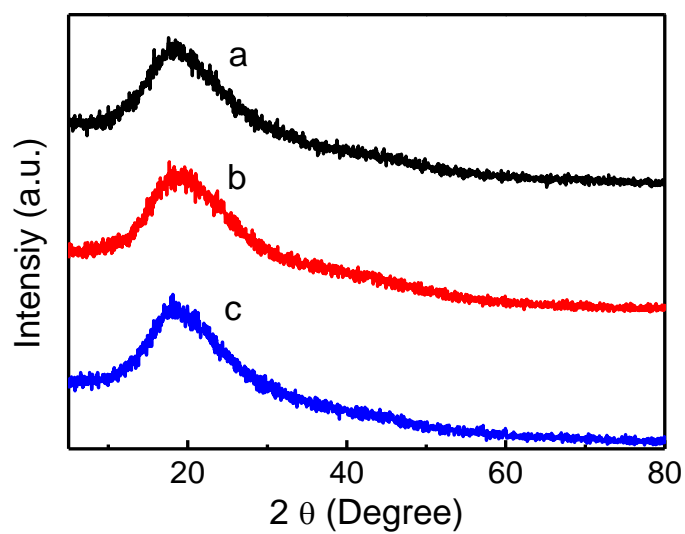

Figure. S4. (a-c) XRD patterns of C-dots synthesized from  $\alpha$ ,  $\beta$  and  $\gamma$ -cyclodextrins, respectively.

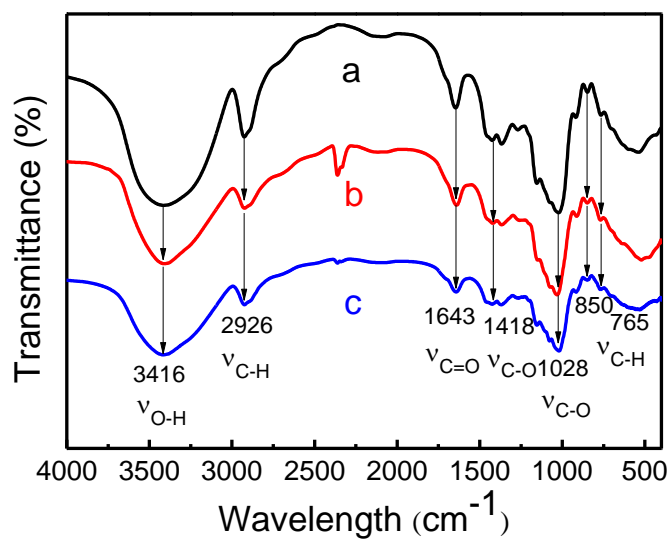

Figure. S5. (a-c) FT-IR spectra of C-dots synthesized from  $\alpha$ ,  $\beta$  and  $\gamma$ -cyclodextrins, respectively.

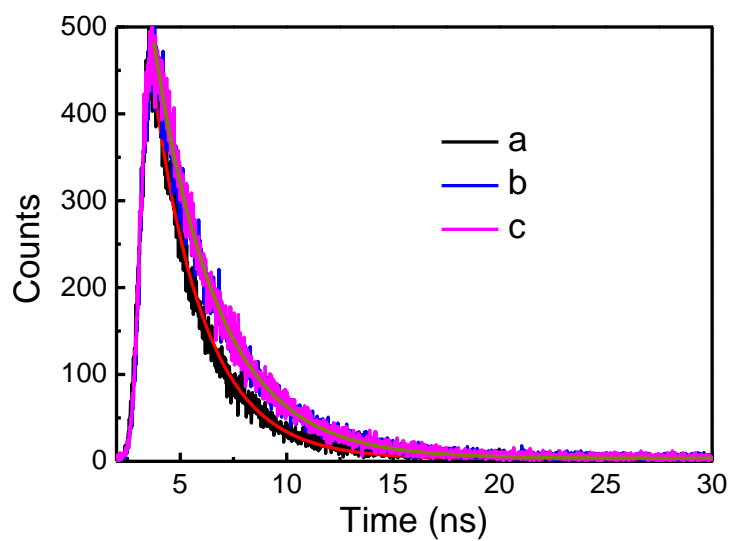

Figure. S6. (a-c) Fluorescence decay profiles of C-dots synthesized from  $\alpha$ ,  $\beta$  and  $\gamma$ -cyclodextrins, respectively.

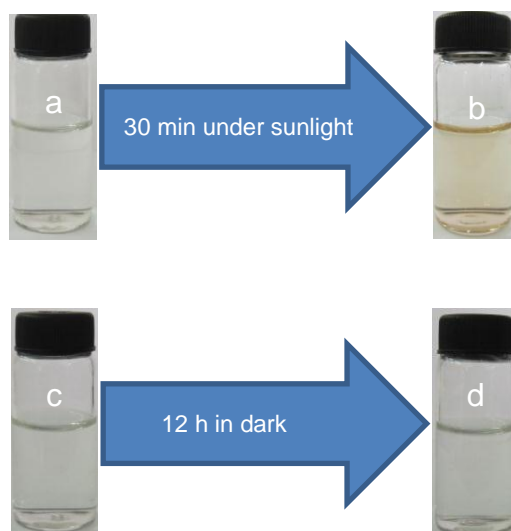

Figure. S7. (a, b) Photographs of C-dots (200 mg/L) and  $\text{AgNO}_3$  (200  $\mu\text{M}$ ) mixture before and after reaction under sunlight for 30 min. (c,d) Photographs of C-dots (200 mg/L) and  $\text{AgNO}_3$  (200  $\mu\text{M}$ ) mixture before and after reaction in dark for 12h.

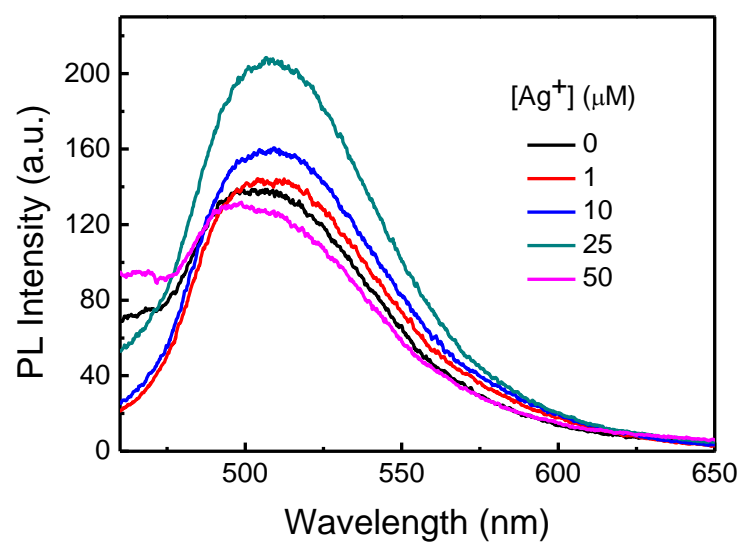

Figure. S8. Representative FL emission spectra of aqueous solutions of C-dots (100 mg/L) and  $\text{AgNO}_3$  with different concentrations (0-25  $\mu\text{M}$ ) after 30 min under sunlight.

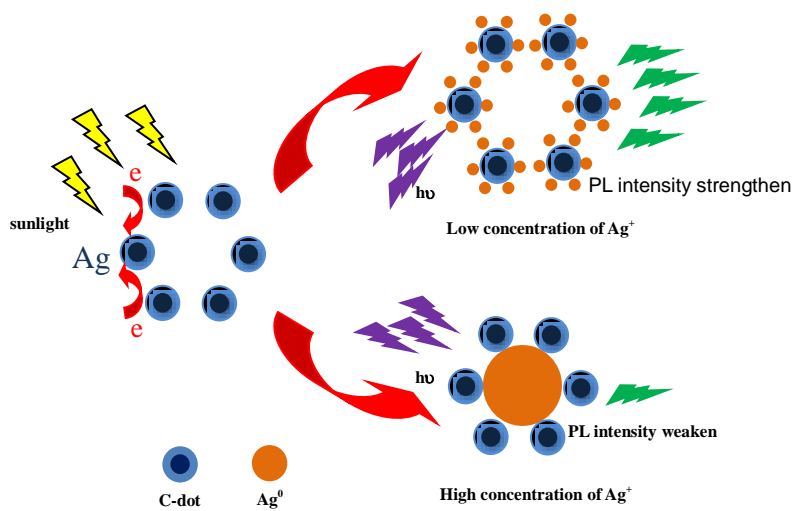

Figure. S9. Schematic representation of reduction of  $\text{Ag}^+$  to  $\text{Ag}^0$  by C-dots under sunlight.

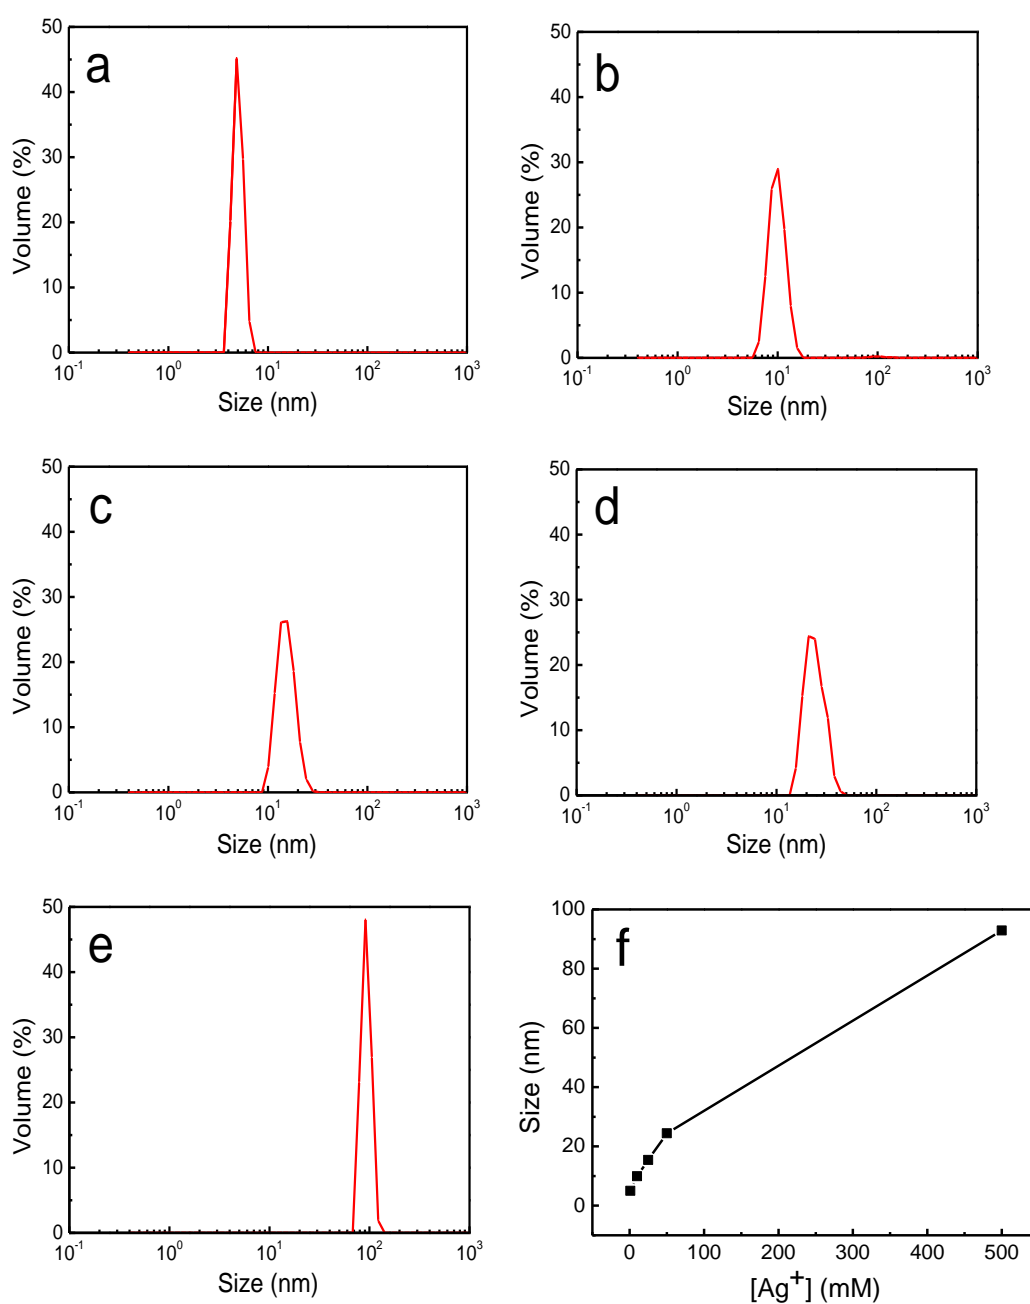

Figure. S10. Size distribution of C-dots (100 mg/L) with different concentrations of  $\text{AgNO}_3$  after 30 min under sunlight: (a) 1, (b) 10, (c) 25, (d) 50, (e) 500  $\mu\text{M}$ . (f) The relationship between the average particle size and  $\text{AgNO}_3$  concentration.
